# Supplementary material
Source: PubMed Central journal article supplement (PMC1857265)
Supplement: JCI0730513sd.pdf [file JCI0730513sd.pdf]

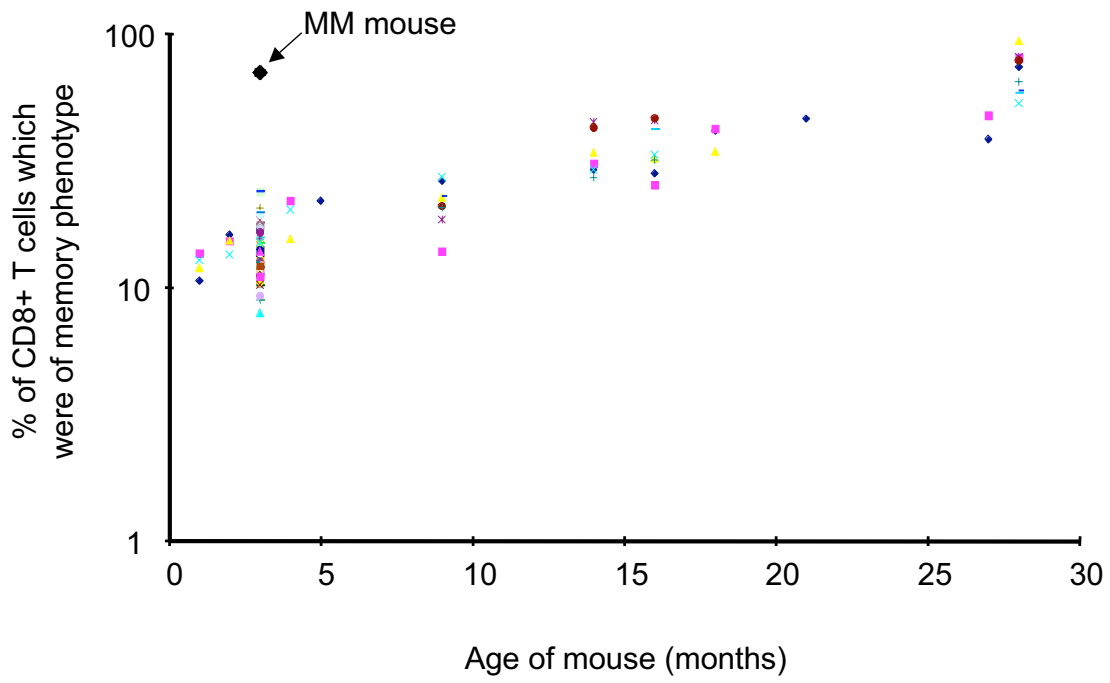

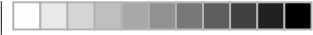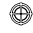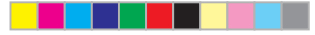

Khiong et al. Figure S2

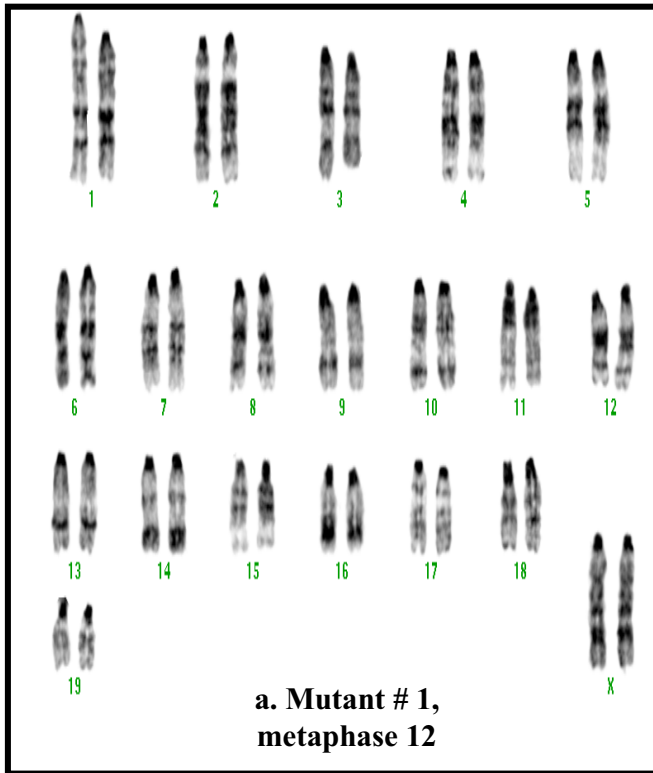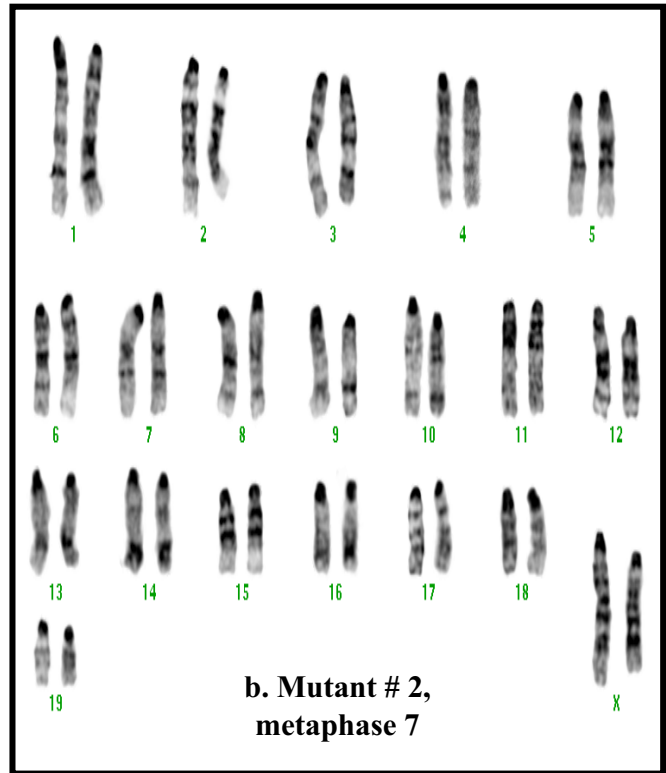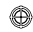

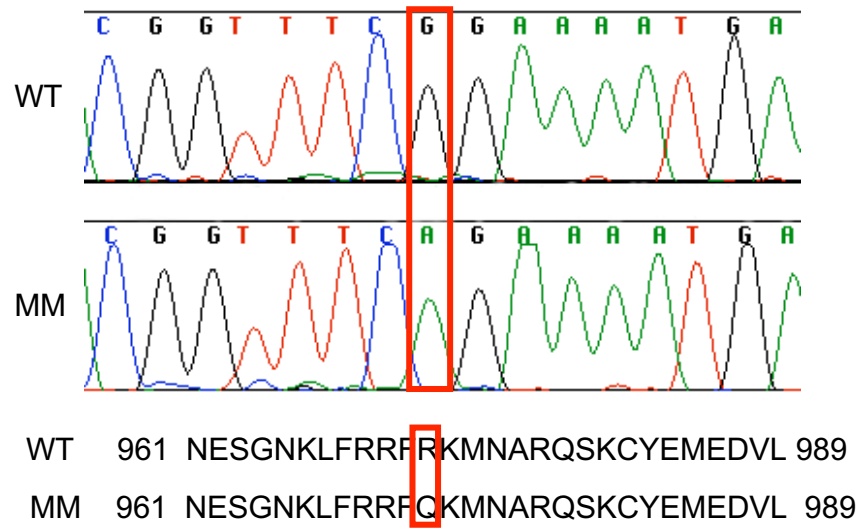

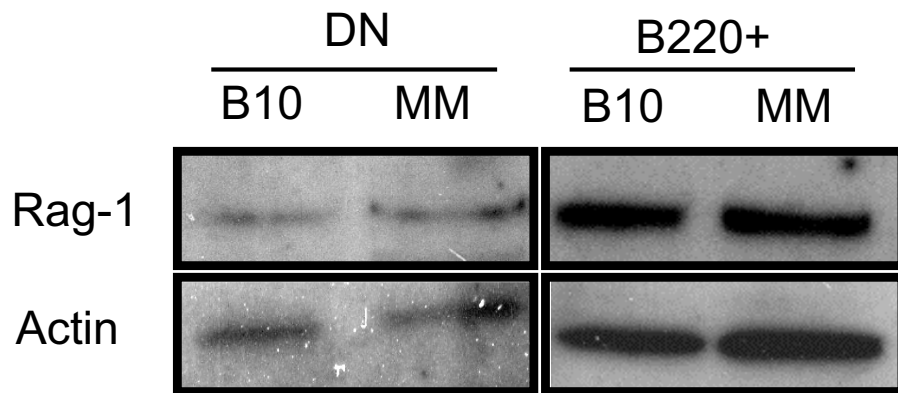

Khiong et al.  
Figure S5

**WT**

**MM**

**Skin**

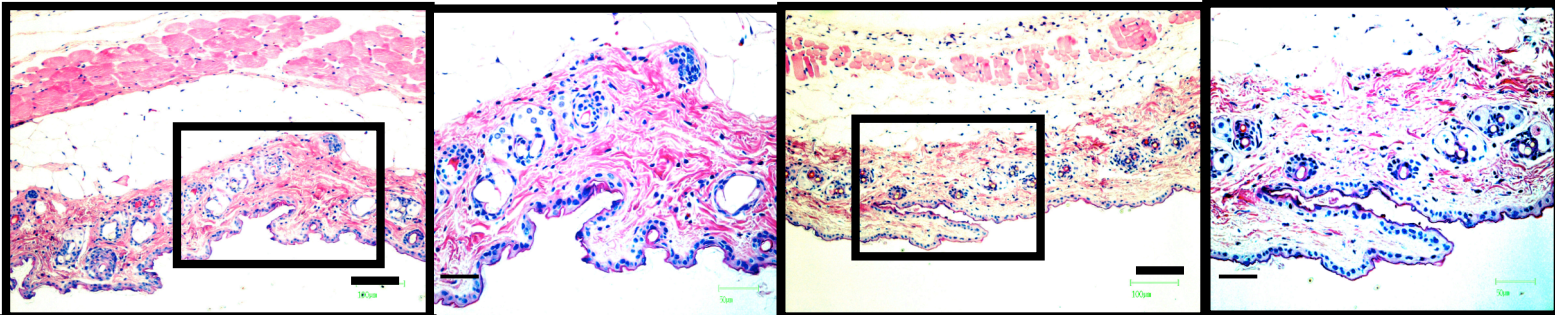

**Thymus**

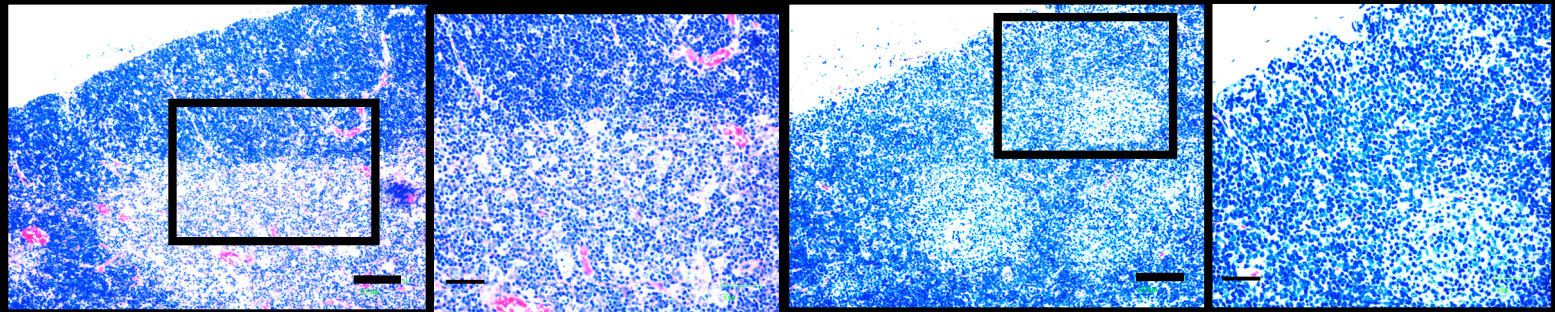

**Spleen**

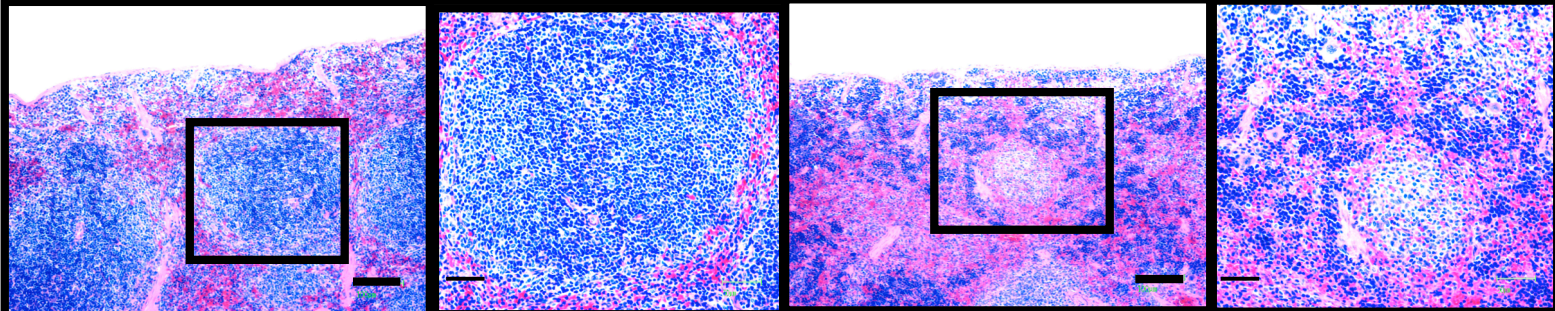

**LN**

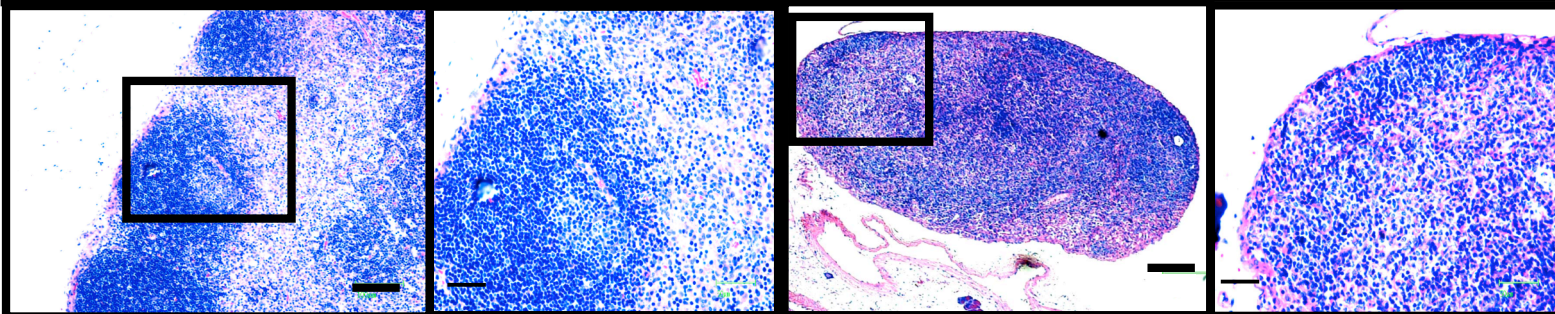

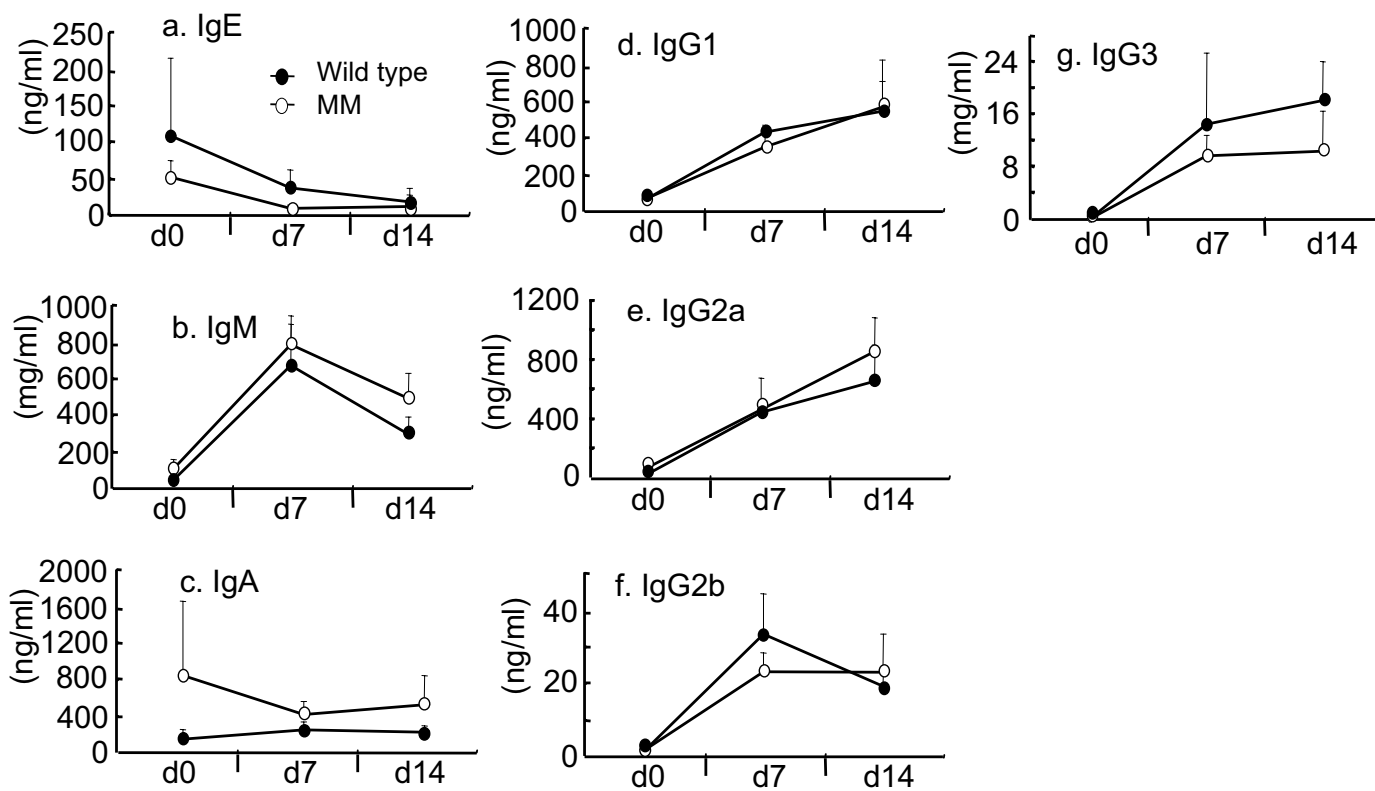

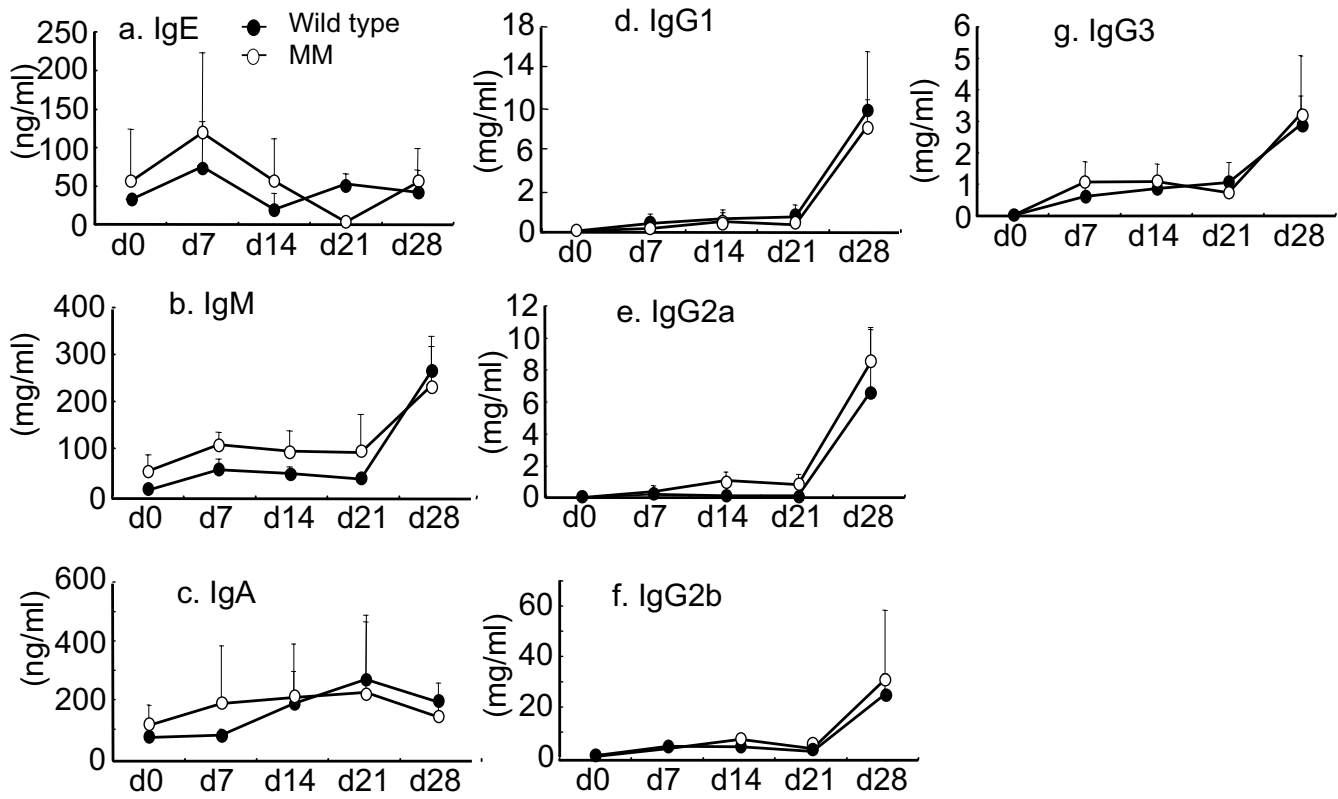

Khiong et al. Figure S8

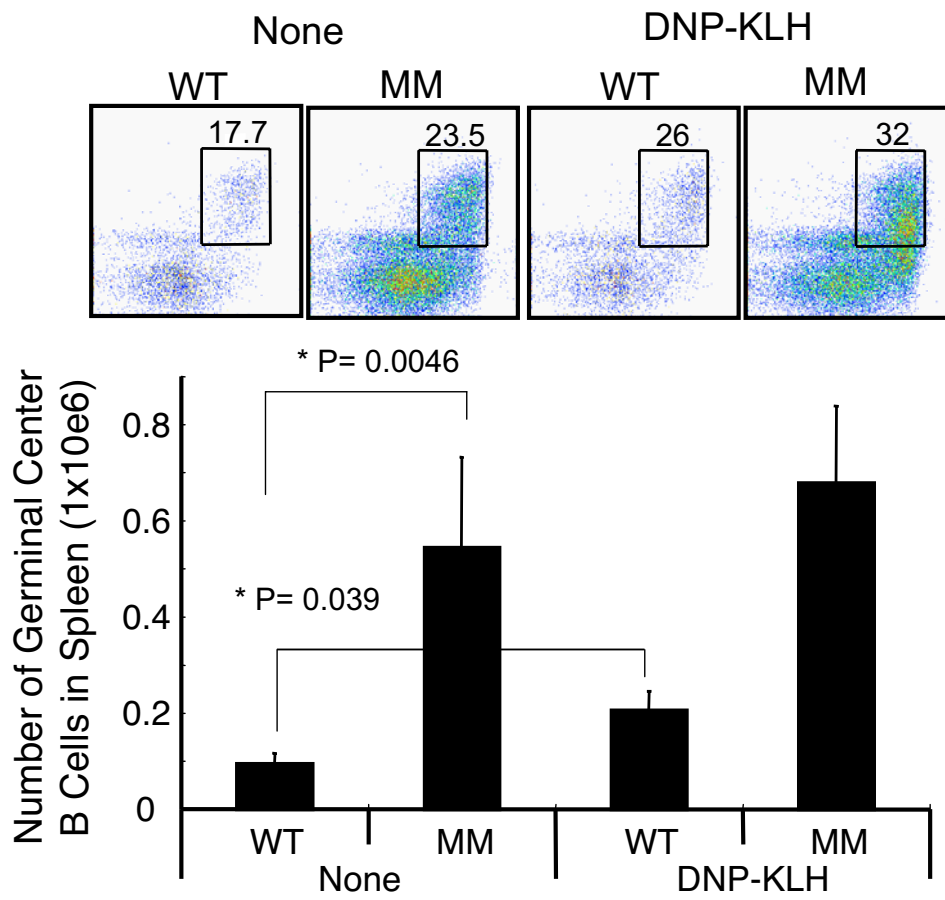



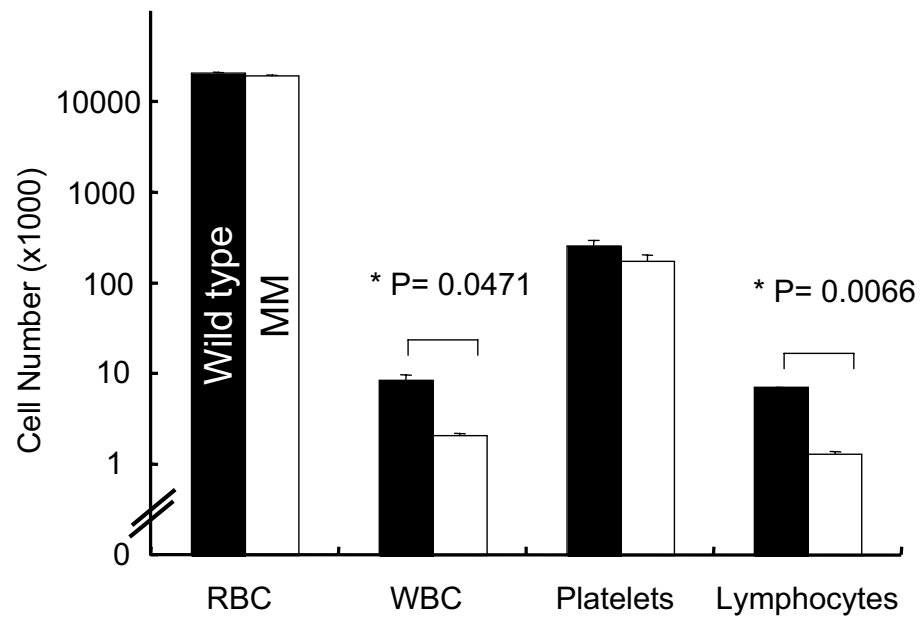

Khiong et al. Figure S10

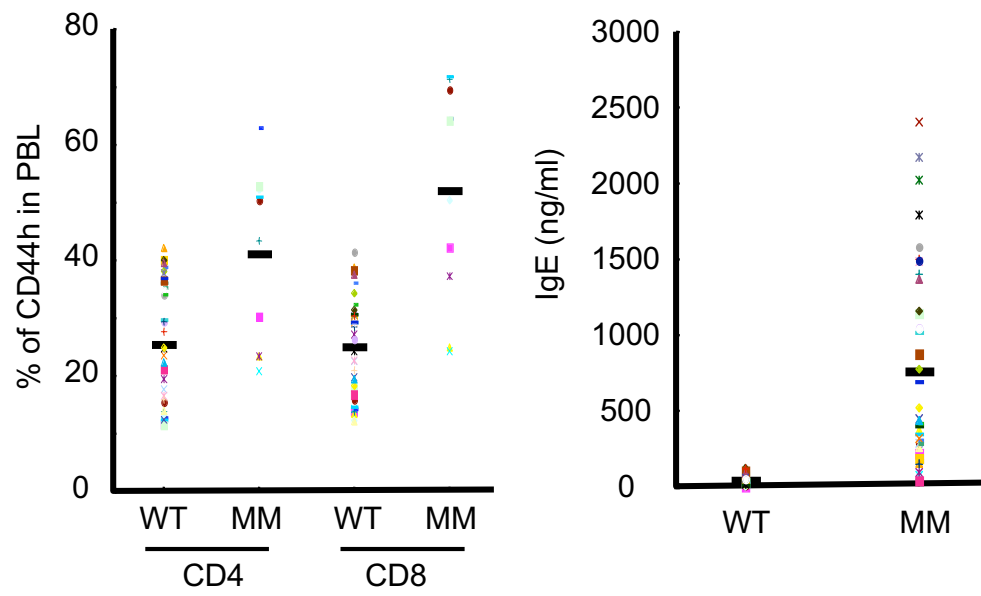

| No | Gene            | No | Gene           | No | Gene           |
|----|-----------------|----|----------------|----|----------------|
| 1  | B230I18H07 Rik  | 15 | Ehf            | 29 | Loc 433459     |
| 2  | Rag2            | 16 | BC016548       | 30 | D430041D05 Rik |
| 3  | Rag1            | 17 | Elf-5          | 31 | Loc 433460     |
| 4  | Traf6           | 18 | Cat            | 32 | Hipk3          |
| 5  | 2600010E01 Rik  | 19 | AW 539457      | 33 | Cstf3          |
| 6  | 1810029F08 Rik  | 20 | AI 429152      | 34 | C130096D04 Rik |
| 7  | AI 194318       | 21 | Gpiap 1        | 35 | Loc 241593     |
| 8  | Trim 44         | 22 | Loc 433458     | 36 | AV 216087      |
| 9  | Fjx-1           | 23 | Lmo2           | 37 | 4732246123 Rik |
| 10 | E430002G05 Rik  | 24 | 4931422A03 Rik | 38 | 2310047K21 Rik |
| 11 | Slc1a           | 25 | FbxO3          | 30 | 9930111I18 Rik |
| 12 | CD44            | 26 | Cd59b          | 40 | 4931417A20     |
| 13 | Pdhx            | 27 | Cd59a          | 41 | Ga17           |
| 14 | Mmrp-19 pending | 28 | A930018P22 Rik | 42 | 0610012H03 Rik |

Table S2. A list of candidate genes. The candidate genes lay between the D2Mit333 and D2Mit473 markers.

**Supplementary Figure 1.** FACS analysis was performed using PBL. The percentage of CD8 T cells that were of memory phenotype CD8 T cells (CD122<sup>high</sup>) was investigated using over 300 mice from regular C57BL6, C57BL10, and BALB/c colonies.

**Supplementary Figure 2.** Cytogenetic GTL band analysis using activated T cells from MM mice.

**Supplementary Figure 3.** We investigated the nucleotide sequences of the candidate genes in the MM mouse and found one point mutation (G to A) in the core domain of the Rag1 gene. This mutation induced an amino acid substitution (R to Q) in the Rag1 protein.

**Supplementary Figure 4.** Western blotting for Rag1 molecules using CD4-CD8<sup>-</sup> thymocytes or B220<sup>+</sup> bone marrow cells.

**Supplementary Figure 5.** Histological examination. The bars in the Figures indicate 100 or 50  $\mu\text{m}$  (magnified).

**Supplementary Figure 6.** In vivo immunization of TD antigens.

**Supplementary Figure 7.** In vivo immunization of TI antigens.

**Supplementary Figure 8.** Analysis of germinal center B cells.

**Supplementary Figure 9.** Results of hematological analysis.

**Supplementary Figure 10.** Variations in memory phenotypes of T cells and serum IgE in MM Mice.

**Supplementary Table 1.** List of candidate genes.
